# Supplementary material for: Nanoflower-shaped cobalt-metal–organic framework as an oxidase-like nanozyme and 1,2-diaminobenzene as a catalytic substrate for the innovative signal “off-on” aptamer sensing of prostate-specific antigen
Source: Royal Society of Chemistry journal article supplement (doi:10.1039/d6ra01552b), 2026-05-05
Supplement: d6ra01552b1.pdf [file d6ra01552b1.pdf]

## **Supporting information**

### **Cobalt-metal-organic frameworks nanoflower as oxidase-like nanozyme and 1,2-diaminobenzene as catalytical substrate for innovatively signal “off-on” aptamer sensing of prostate-specific antigen**

Chen Ji,<sup>a#</sup> Yi Zhang,<sup>a#</sup> Xingtian Wang,<sup>a</sup> Pingying Xie,<sup>a</sup> Shaoting Wu,<sup>c\*</sup> Yanfang Zheng,<sup>b\*</sup> Mingqing Huang<sup>b\*</sup>

<sup>a</sup> Department of Urology, The Affiliated People’s Hospital of Fujian University of Traditional Chinese Medicine, Fuzhou 350004, China

<sup>b</sup> The Affiliated People’s Hospital, College of Pharmacy, Fujian University of Traditional Chinese Medicine, Fuzhou 350122, China

<sup>c</sup> Department of Clinical Neurophysiology The Affiliated People’s Hospital of Fujian University of Traditional Chinese Medicine, Fuzhou 350004, China

---

<sup>#</sup> Co-first authors.

\* Corresponding authors: hmql115@126.com (M. Huang); 815181526@qq.com (S. Wu); yfzheng@fjtcu.edu.cn (Y. Zheng).

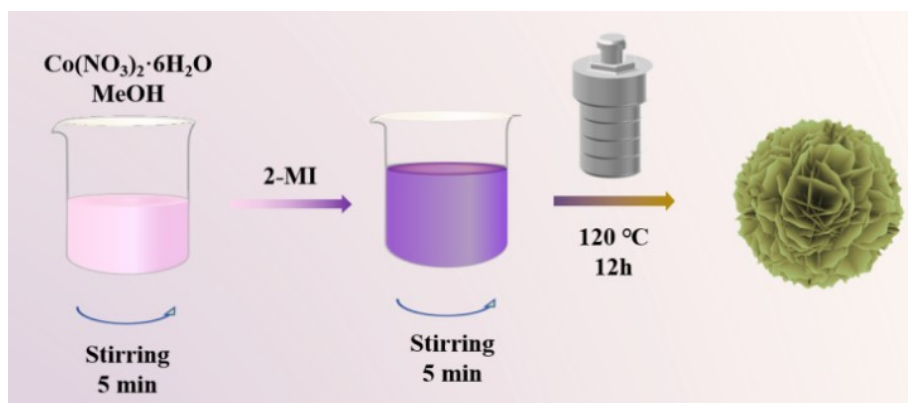

**Scheme S1.** Schematic illustration for the preparation of Co-MOF nanozyme.

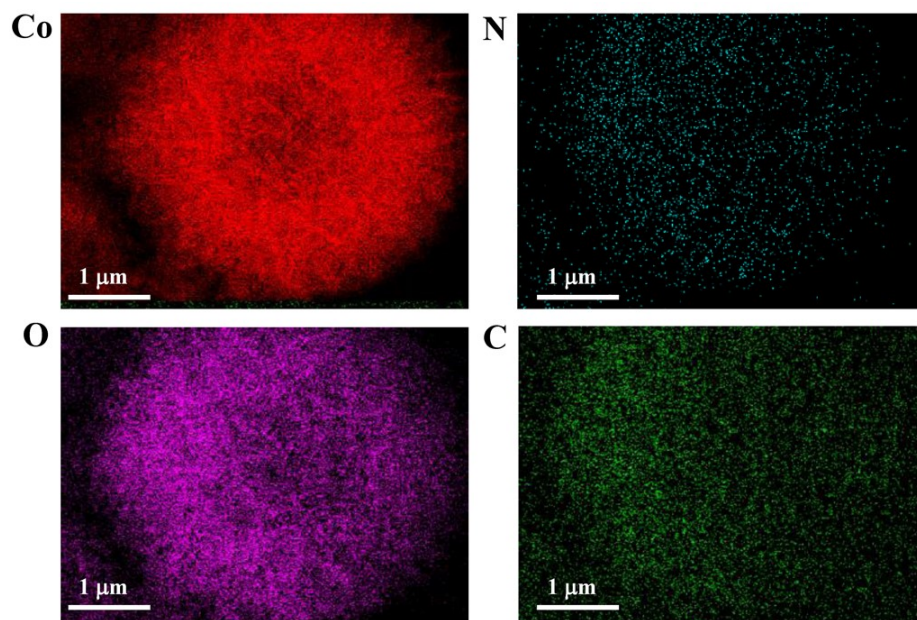

**Figure S1.** EDS elemental maps of Co-MOFs.

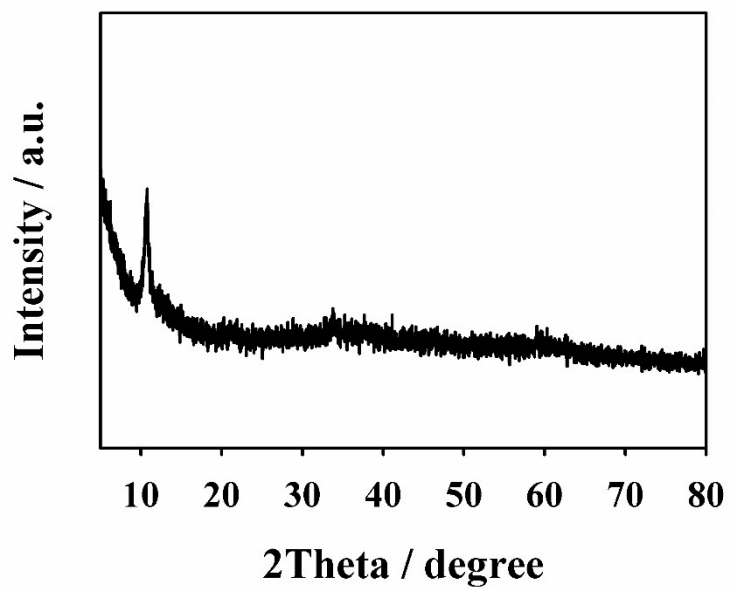

**Figure S2.** PXRD pattern of Co-MOFs.

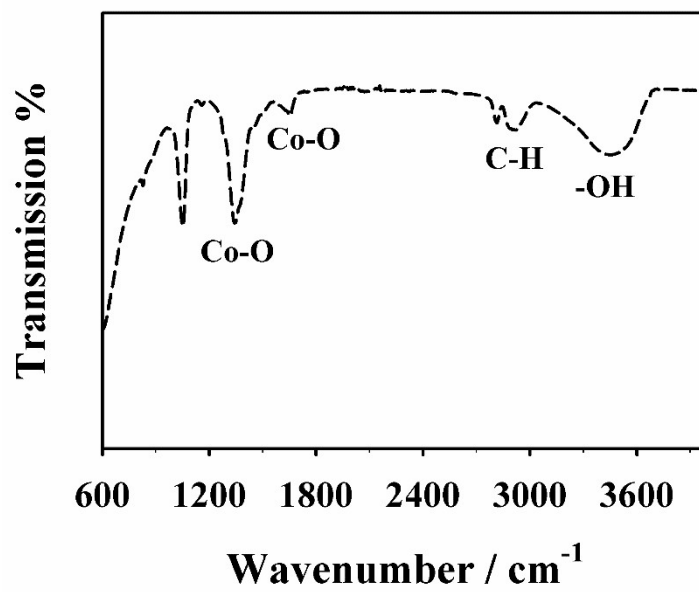

**Figure S3.** FTIR spectrum of Co-MOFs.

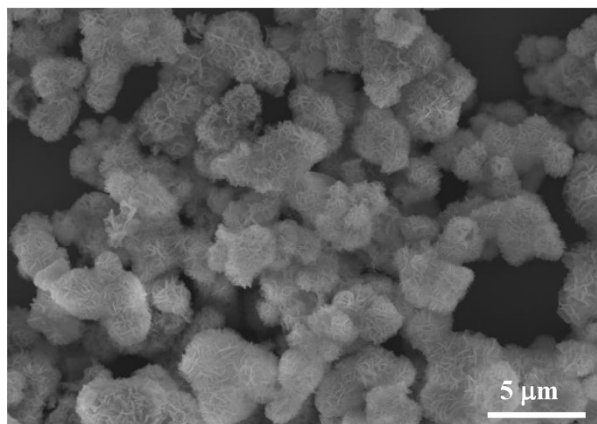

**Figure S4.** The SEM image of Co-MOFs nano hybrids on the surface of GCE.

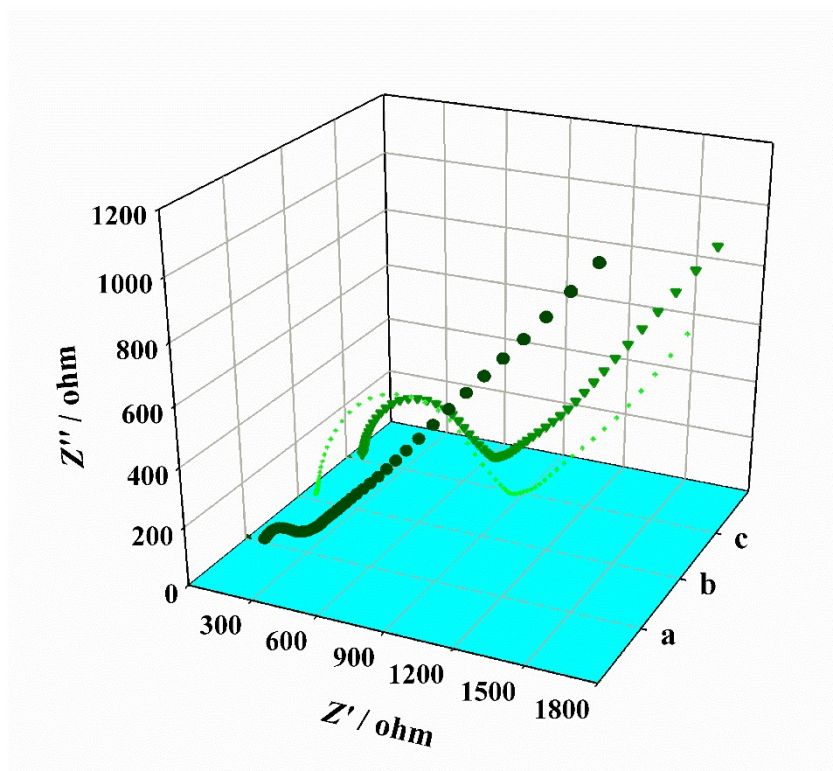

**Figure S5** EIS plots of Co-MOFs/GCE (a), Apt/Co-MOFs/GCE before (b) and after (c) incubation with PSA in 0.1 M KCl solution containing 5 mM  $[\text{Fe}(\text{CN})_6]^{3-/4-}$ .

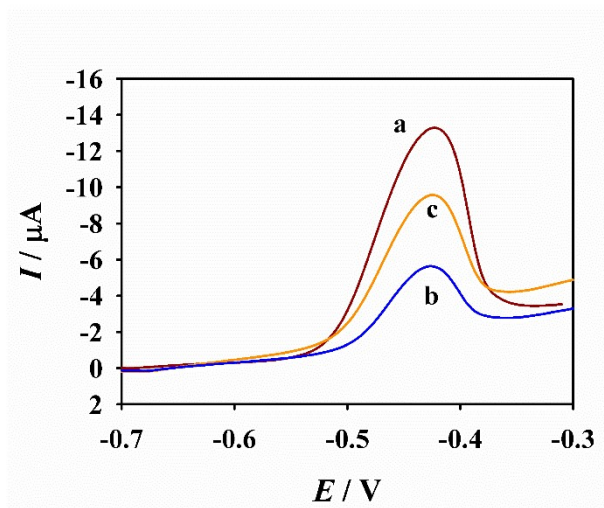

**Figure S6.** DPV response signals of DAP at Co-MOFs/GCE (a), Apt/Co-MOFs/GCE before (b) and after (c) incubation with CEA.

**Table S1.** PSA recovery tests in human serum samples.

| Sample | Added (pg/mL) | Detected (pg/mL) | Recovery | RSD (%) | ELISA  |
|--------|---------------|------------------|----------|---------|--------|
| a      | 300           | 286.5            | 95.5     | 3.24    | 292.3  |
| b      | 500           | 463.6            | 92.7     | 2.85    | 476.5  |
| c      | 800           | 772.4            | 96.5     | 2.64    | 785.6  |
| d      | 2000          | 1983.6           | 99.18    | 2.57    | 1990.2 |
